# Supplementary material
Source: PubMed Central journal article supplement (PMC8923943)
Supplement: NIHMS1767705-supplement-2.pdf [file NIHMS1767705-supplement-2.pdf]

Supplementary Table 1

|                | Identifier | Age/<br>Sex | ARMS2         |                          | CFH            | EFEMP1         | HTRA1  | TIMP3          |              |              |
|----------------|------------|-------------|---------------|--------------------------|----------------|----------------|--------|----------------|--------------|--------------|
|                |            |             | A69S<br>(G>T) | indel<br>(polyA<br>tail) | Y402H<br>(T>C) | R345W<br>(C>T) | G>A    | S204C<br>(A>T) | T191C<br>(A) | S179C<br>(C) |
| <b>CONTROL</b> | nRD1       | 77/M        | Hetero        | indel                    | Homo           | Normal         | Hetero | Normal         | Normal       | Normal       |
|                | nRD5       | 69/M        | Hetero        | indel                    | Homo           | Normal         | Hetero | Normal         | Normal       | Normal       |
|                | nRD6       | 66/M        | Normal        | Normal                   | Normal         | Normal         | Normal | Normal         | Normal       | Normal       |
| <b>SFD</b>     | RD1        | 66/F        | Homo          | indel                    | Hetero         | Normal         | Homo   | Hetero         | Normal       | Normal       |
|                | RD9        | 58/F        | Hetero        | indel                    | Homo           | Normal         | Hetero | Hetero         | Normal       | Normal       |

Supplementary Table 2

| RPE Cell Lines                         | iPSC Clone/<br>RPE # | Figures                                                             |
|----------------------------------------|----------------------|---------------------------------------------------------------------|
| nRD1<br>(Control)                      | #2                   | 2D- F, 6G                                                           |
|                                        | #3                   | 5D                                                                  |
|                                        | #4                   | 2B, 3C&D, 6C                                                        |
|                                        | #5                   | 2B&C;3A,3C&D,5A,5D                                                  |
|                                        | #6                   | 2B, 6F                                                              |
| nRD5<br>(Control)                      | #5                   | 2B- F, 5B-D, 6B&C, 6G, Sup Fig 3B&D, 3F, 3I                         |
|                                        | #8                   | 2D, 3C&D, 5C, 6G                                                    |
|                                        | #9                   | 2D-F, 5A, 5C, 6G                                                    |
| nRD6<br>(Control)                      | #1                   | 2A, 2C-F, 5B, 6G                                                    |
| RD1<br>(SFD, V-2)                      | #21                  | 2B-F, 3C&D, 5A,5C&D,6C, E&G                                         |
|                                        | #22                  | 2B-F, 3C&D, 5B-D, 6E&G                                              |
|                                        | #24                  | 2B-F, 3C&D, 5A-D, 6E&G                                              |
| RD9<br>(SFD, V-7)                      | #4                   | 2B-F, 3C&D, 5B-D, 6E&G, Sup Fig 3I                                  |
|                                        | #6                   | 2B-F, 3B, 3C&D, 3E-E", 4B, 4D, 4F,<br>Sup3H&I, 5A, 5C-D, 6B&C, 6E&G |
|                                        | #7                   | 2A, 2B-F, 3C&D, 5A&B, 5D,6E&G, Sup Fig 3I                           |
| ncRD9<br>(CRISPR,<br>uncorrected, V-7) | #1                   | 6F&G                                                                |
| cRD9<br>(CRISPR,<br>corrected, V-7)    | #6.1                 | 6B,C,F,G                                                            |
|                                        | #6.2                 | 6B,C,D,E,G                                                          |

Supplementary Table 3

| <b>Primers sequences used in sequencing</b> |                       |                                        |                                        |
|---------------------------------------------|-----------------------|----------------------------------------|----------------------------------------|
| <b>Gene</b>                                 | <b>Mutation</b>       | <b>Forward (5'-3')</b>                 | <b>Reverse (5' – 3')</b>               |
| ARMS2                                       | A69S                  | <i>G TTCCTGTGTCC TTCATTTCCACTC</i>     | <i>GGTAAGGCCTGATCATCTGCATT</i>         |
| ARMS2                                       | Insertion-deletion    | <i>GCCACACTGTGCAACCTGGAATTC</i>        | <i>AGGTTGTCCCTCTAGATCCAGGGTG</i>       |
| CFH                                         | Y402H                 | <i>GTGCAAACCTTTGTTAGTAACTTTAGTTCG</i>  | <i>CAAGGTGACATAAACATTTTGCCAC</i>       |
| EFEMP1                                      | R345W                 | <i>GTGTTGGCATAAATAGTTGTGGCCTGT A</i>   | <i>AGGCAGAGTCAGTGGTTAACATTGGG</i>      |
| HTRA1                                       | Promoter G>A          | <i>CATCTGAGACCGCTCCACCCTCGCCA GTTA</i> | <i>CGCTTTCCGCAGGTTCTCTCGCTGAG ATTC</i> |
| TIMP3                                       | S179C / T191C / S204C | <i>GTAGCCTCAGGCCTGGGCATA</i>           | <i>TGTCATCATCTGGGAAGAGTTAGTGT C</i>    |
| TIMP3                                       | Off-Target 1          | <i>AGTAGACCCTGACAATGCCACG</i>          | <i>TCAA AACCCCTAACATAACTTTGGCC</i>     |
| TIMP3                                       | Off-Target 2          | <i>CCATTCTTTCAAGGATCGTTTATCTTTCTC</i>  | <i>AACTTTGTCTTGGCTTCAGGGTT CAG AGA</i> |
| <b>Primers sequences used in qPCR</b>       |                       |                                        |                                        |
| <b>Gene</b>                                 |                       | <b>Forward (5'-3')</b>                 | <b>Reverse (5' – 3')</b>               |
| ApoE                                        |                       | <i>CTGGCACTGGGTCGCTTTT</i>             | <i>AGTTGTTCCCTCCAGTTCCGATTT</i>        |
| Bestrophin                                  |                       | <i>AACCATTGGAAACATTTAACTCAGAC</i>      | <i>AGTGCCGTTGTT CAGTTCTAATC</i>        |
| COL6A1                                      |                       | <i>AGCAAGTGTGCTGCTCCTTC</i>            | <i>CTCCAGGATCTCCGGCTTC</i>             |
| CRALBP                                      |                       | <i>CACGCTGCCCAAGTATGATG</i>            | <i>CCAGGACAGTTGAGGAGAGG</i>            |
| GAPDH                                       |                       | <i>TGAAGGTCGGAGTCAACGGA</i>            | <i>CCATTGATGACAAGCTTCCCG</i>           |
| RPE65                                       |                       | <i>TACAGAAAGCACTGAGTTGAGC</i>          | <i>CCATTTAGTAAGTCCACATTCATTTCC</i>     |
| TIMP3                                       |                       | <i>GCAGATAGACTCAAGGTGTGTGAAA</i>       | <i>TCCCTCACTCTTACATGCAGACA</i>         |
| Vitronectin                                 |                       | <i>GAAGCCGTCAGAGATATTTTCG</i>          | <i>CCTTCACCGACCTCAAGAAC</i>            |

Supplementary Table 4

| METABOLITE                  | CAS        | PLATFORM | POLARITY | PRECURSOR (Da) | PRODUCT (Da) |
|-----------------------------|------------|----------|----------|----------------|--------------|
| 3-hydroxybutyric acid       | 300-85-6   | LC MS/MS | Positive | 105            | 23           |
| 3-hydroxykynurenine         | 484-78-6   | LC MS/MS | Negative | 223            | 75           |
| $\alpha$ -ketoglutarate     | 328-50-7   | LC MS/MS | Negative | 145            | 101          |
| Alanine                     | 02-72-7    | LC MS/MS | Negative | 134            | 107          |
| AMP                         | 61-19-8    | LC MS/MS | Negative | 346            | 134          |
| Ascorbic Acid               | 50-81-7    | LC MS/MS | Negative | 175            | 87           |
| Asparagine                  | 70-47-3    | LC MS/MS | Positive | 133            | 70           |
| Aspartate                   | 56-84-8    | LC MS/MS | Positive | 134            | 74           |
| ATP                         | 56-65-5    | LC MS/MS | Positive | 508            | 136          |
| Carnitine                   | 541-15-1   | LC MS/MS | Positive | 163            | 85           |
| cGMP                        | 7665-99-8  | LC MS/MS | Negative | 344            | 150          |
| Choline                     | 62-49-7    | LC MS/MS | Positive | 104            | 60           |
| Citrate                     | 126-44-3   | LC MS/MS | Negative | 191            | 87           |
| Creatinine                  | 60-27-5    | LC MS/MS | Negative | 112            | 41           |
| FAD                         | 146-14-5   | LC MS/MS | Positive | 786            | 136          |
| Fumarate                    | 142-42-7   | LC MS/MS | Positive | 117            | 59           |
| Glutamate                   | 11070-68-1 | LC MS/MS | Positive | 148            | 84           |
| Glutamine                   | 56-85-9    | LC MS/MS | Positive | 147            | 84           |
| Glycine                     | 56-40-6    | LC MS/MS | Positive | 76             | 30           |
| GSH (glutathione)           | 70-18-8    | LC MS/MS | Negative | 306            | 143          |
| GSSG (oxidized glutathione) | 121-24-4   | LC MS/MS | Negative | 611            | 306          |
| GTP                         | 86-01-1    | LC MS/MS | Negative | 522            | 159          |
| Hydroxyproline              | 51-35-4    | LC MS/MS | Positive | 132            | 86           |
| Isoleucine                  | 443-79-8   | LC MS/MS | Positive | 132            | 69           |
| Lactate                     | 50-21-5    | LC MS/MS | Negative | 89             | 43           |
| Leucine                     | 61-90-5    | LC MS/MS | Positive | 132            | 86           |
| Lysine                      | 56-87-1    | LC MS/MS | Positive | 147            | 84           |
| Methionine                  | 63-68-3    | LC MS/MS | Positive | 150            | 61           |
| N1-Methylnicotinamide       | 3106-60-3  | LC MS/MS | Positive | 137            | 78           |
| NAD                         | 53-84-9    | LC MS/MS | Positive | 664            | 136          |
| NADH                        | 58-68-4    | LC MS/MS | Negative | 664            | 397          |
| NADP                        | 53-59-8    | LC MS/MS | Positive | 744            | 136          |
| Nicotinamide                | 98-92-0    | LC MS/MS | Positive | 123            | 80           |
| Nicotinic acid              | 59-67-6    | LC MS/MS | Negative | 122            | 78           |
| Ophthalmic acid             | 495-27-2   | LC MS/MS | Positive | 290            | 58           |
| Phenylalanine               | 63-91-2    | LC MS/MS | Positive | 166            | 120          |
| Proline                     | 147-85-3   | LC MS/MS | Positive | 116            | 70           |
| Pyroglutamic acid           | 98-79-3    | LC MS/MS | Positive | 130            | 84           |
| Pyruvate                    | 57-60-3    | LC MS/MS | Negative | 87             | 43           |
| Serine                      | 56-45-1    | LC MS/MS | Positive | 106            | 60           |
| Succinate                   | 56-14-4    | LC MS/MS | Negative | 117            | 73           |
| Taurine                     | 107-35-7   | LC MS/MS | Positive | 126            | 108          |
| Threonine                   | 72-19-5    | LC MS/MS | Positive | 120            | 102          |
| Trigonelline                | 535-83-1   | LC MS/MS | Positive | 138            | 92           |
| Tyrosine                    | 60-18-4    | LC MS/MS | Positive | 182            | 136          |
| Valine                      | 72-18-4    | LC MS/MS | Positive | 118            | 72           |
