# Supplementary material
Source: PubMed Central journal article supplement (PMC8923943)

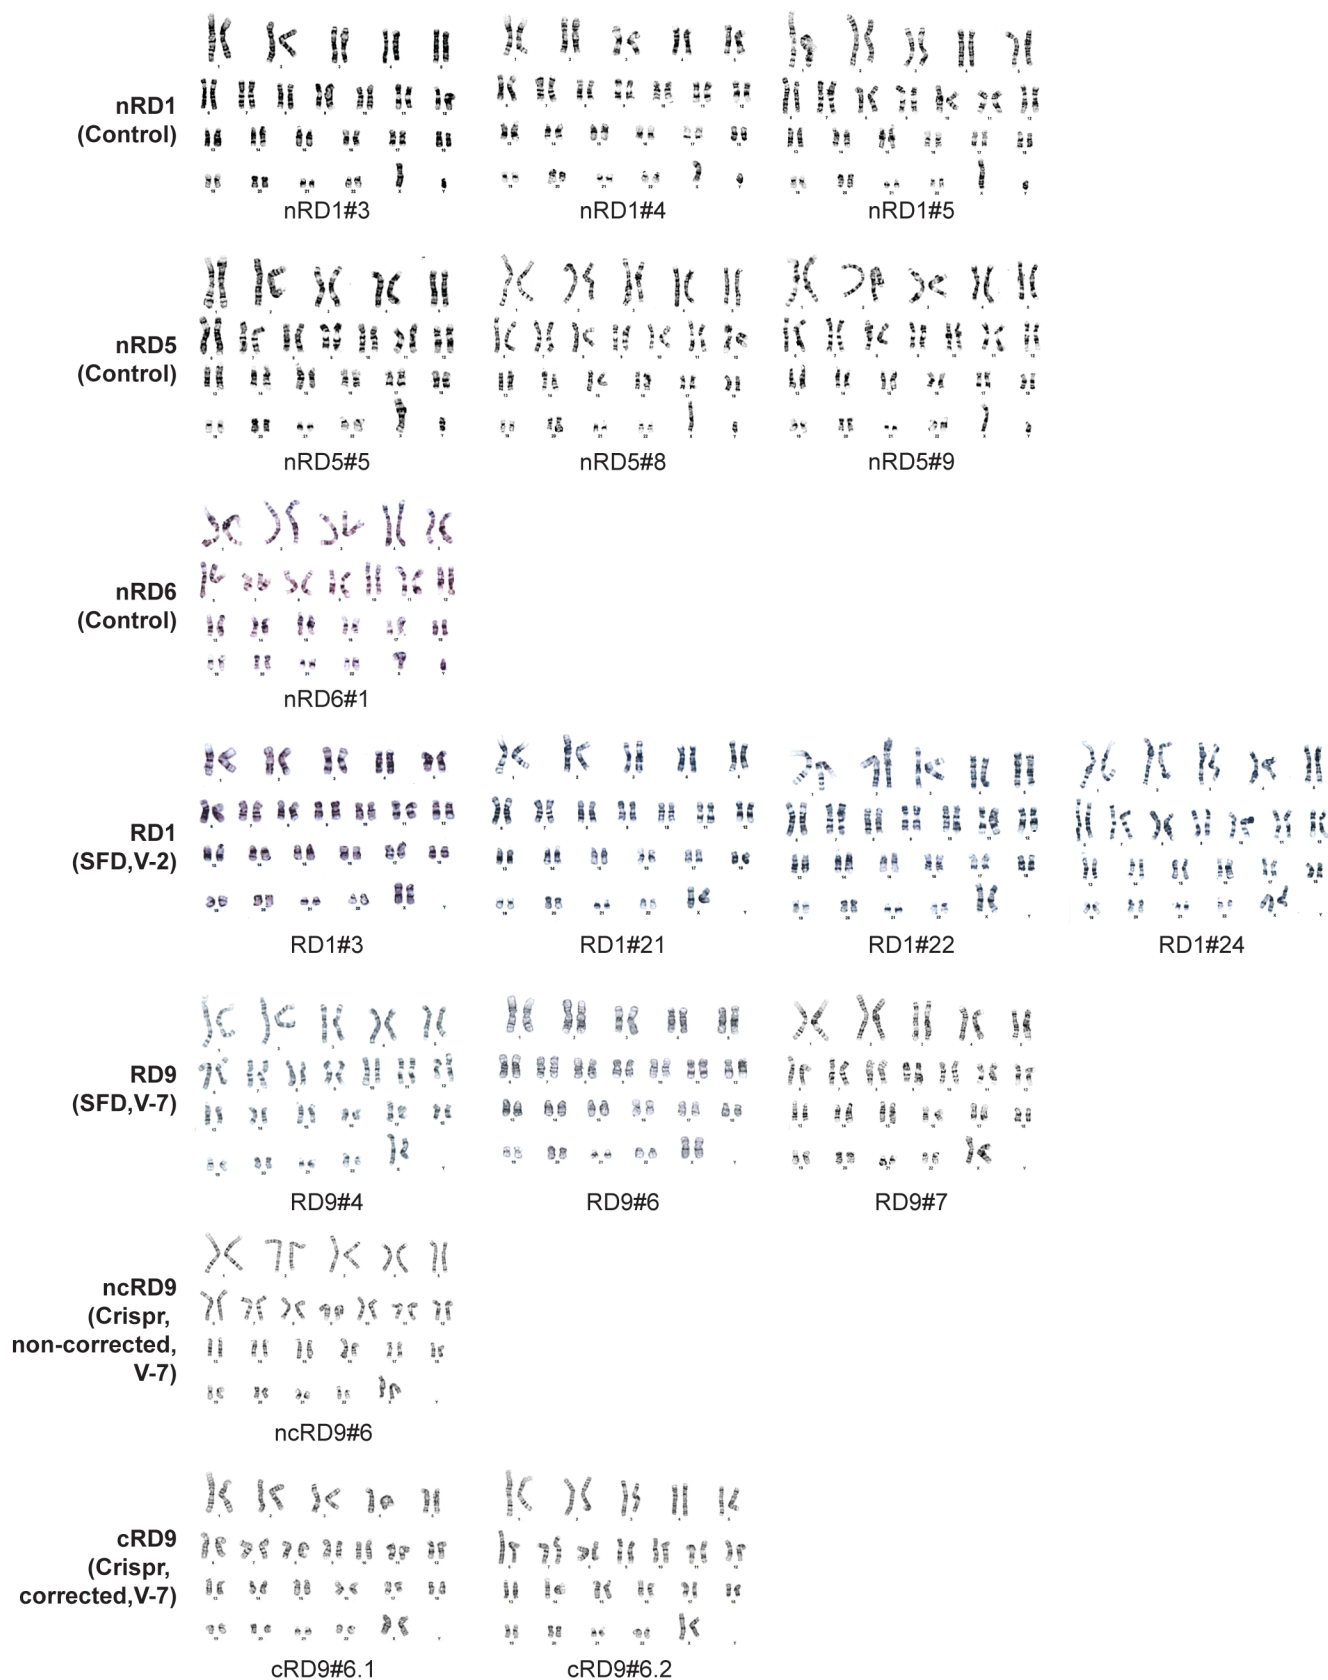

**Supplementary Figure 1**

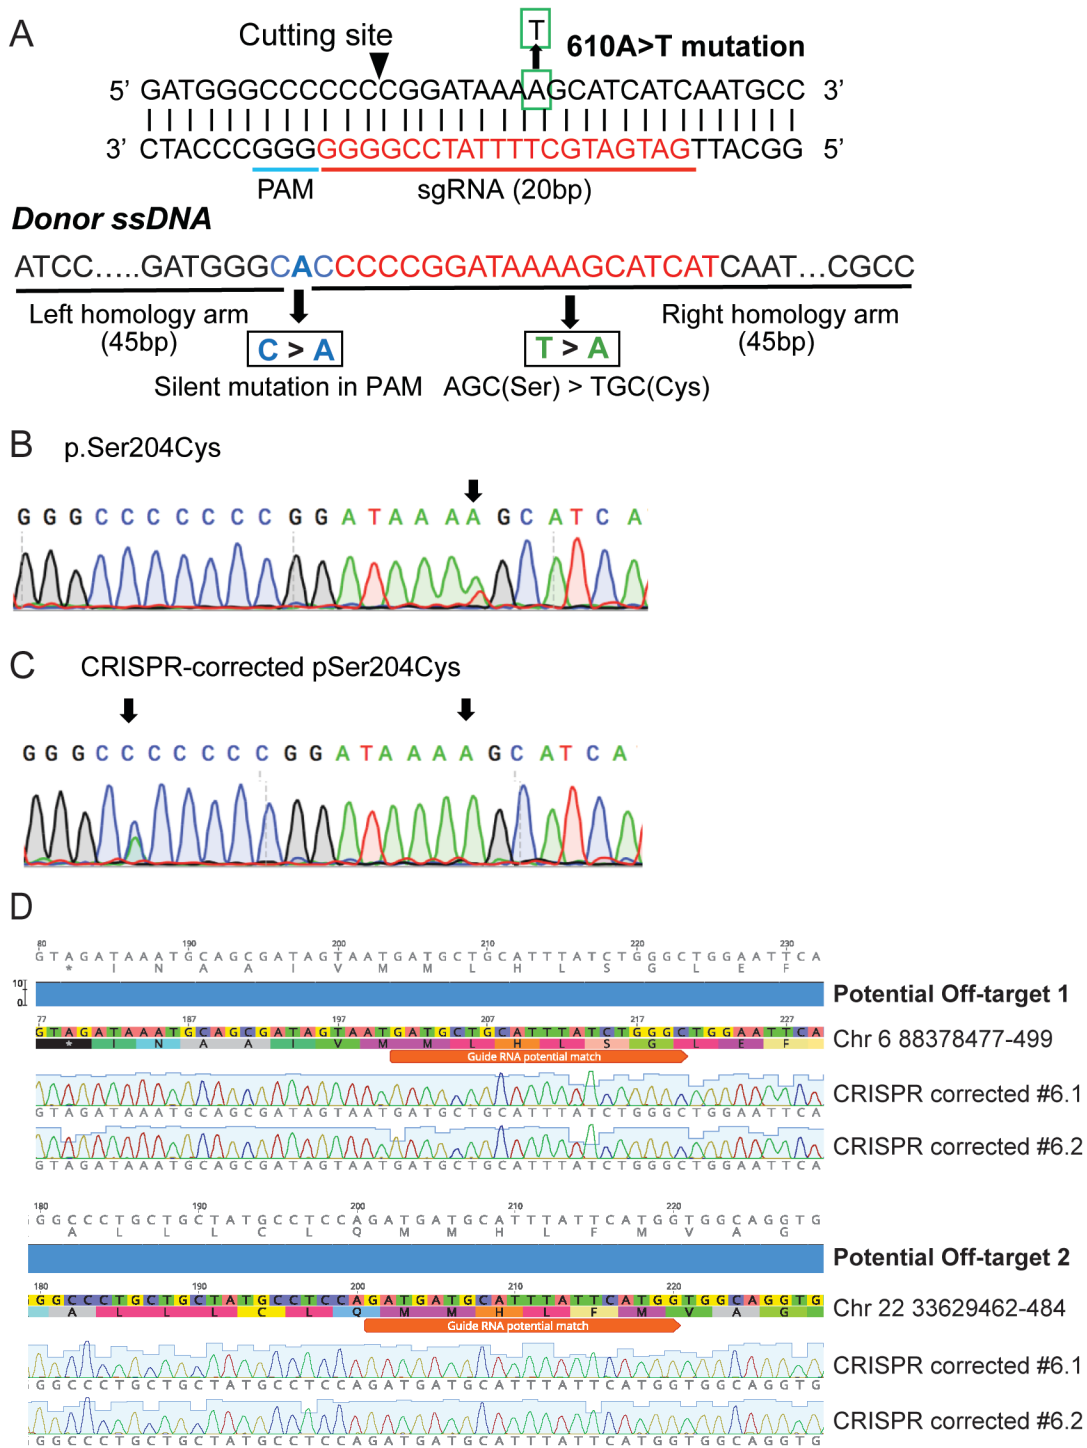

Supplementary Figure 2

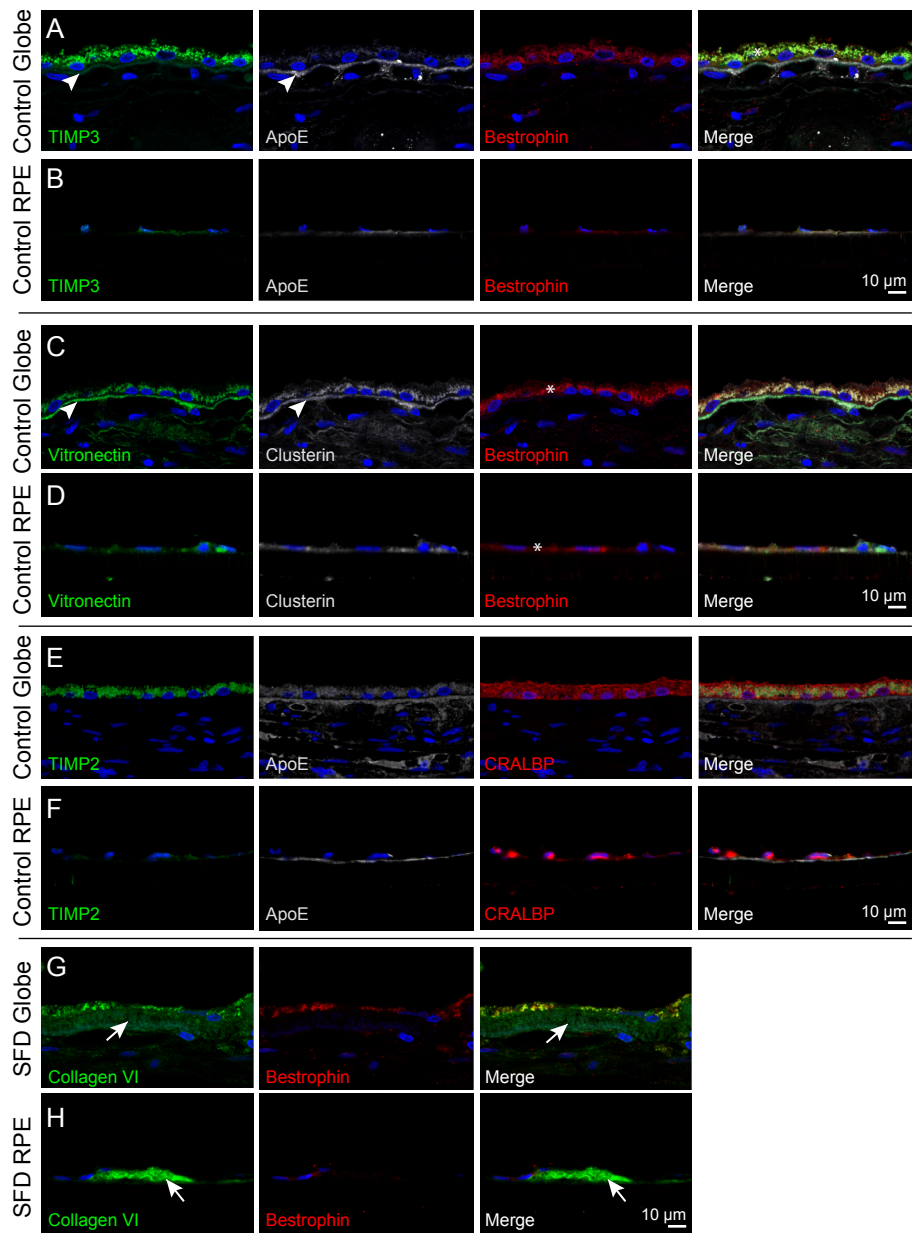

Supplementary Figure 3

Supplement: NIHMS1767705-supplement-1.pdf [file NIHMS1767705-supplement-1.pdf]
